# Supplementary material for: α-Hydroxy-β-keto acid rearrangement–decarboxylation: impact on thiamine diphosphate-dependent enzymatic transformations
Source: Royal Society of Chemistry journal article supplement (doi:10.1039/c2ob26981c), 2012-11-22

## Electronic Supplementary Information

# $\alpha$ -Hydroxy- $\beta$ -keto Acid Rearrangement- Decarboxylation: Impact on Thiamine Diphosphate- Dependent Enzymatic Transformations

*Maryam Beigi,<sup>a</sup> Sabrina Loschonsky,<sup>a</sup> Patrizia Lehwald,<sup>a</sup> Volker Brecht,<sup>a</sup>  
Susana L. A. Andrade,<sup>b</sup> Finian J. Leeper,<sup>c</sup> Werner Hummel,<sup>d</sup> Michael Müller<sup>a,\*</sup>*

<sup>a</sup>Institute of Pharmaceutical Sciences, Albert-Ludwigs-Universität, Albertstraße  
25, 79104 Freiburg, Germany

<sup>b</sup>Institute of Organic Chemistry and Biochemistry, Albert-Ludwigs-Universität, Albertstraße  
21, 79104 Freiburg, Germany,

<sup>c</sup>University of Cambridge, Department of Chemistry, Lensfield Road,  
Cambridge, UK CB2 1EW,

<sup>d</sup>Institute of Molecular Enzyme Technology at the Heinrich-Heine-University of Düsseldorf,  
Research Centre Jülich, Stetterbacher Forst, 52426 Jülich, Germany

[michael.mueller@pharmazie.uni-freiburg.de](mailto:michael.mueller@pharmazie.uni-freiburg.de)

## Table of contents

|                                                                                            |    |
|--------------------------------------------------------------------------------------------|----|
| Additional general experimental procedures                                                 | S2 |
| <sup>13</sup> C NMR studies with α-KG and <sup>13</sup> C-labeled pyruvate                 | S3 |
| <sup>13</sup> C NMR studies with α-KG and <sup>13</sup> C-labeled acetaldehyde             | S4 |
| <sup>13</sup> C NMR studies with in situ production of <sup>13</sup> C-labeled α-KG        | S4 |
| Summary table for the chemical shifts of <sup>13</sup> C-labeled compounds                 | S6 |
| Enzyme separation by ultrafiltration                                                       | S7 |
| <sup>13</sup> C NMR studies for YerE-catalyzed carboligation of pyruvate and 2-oxobutyrate | S7 |
| References                                                                                 | S7 |
| CD spectra                                                                                 | S8 |
| NMR spectra                                                                                | S9 |

## Additional general experimental procedures:

Sodium salts of [1,2-<sup>13</sup>C]- and [2-<sup>13</sup>C]-pyruvate were purchased from *Sigma-Aldrich Co Ltd*. Sodium salt of [1-<sup>13</sup>C]-pyruvate and L-[1,2-<sup>13</sup>C]-glutamic acid were purchased from *Cambridge Isotope Labs*.

The *MenD* gene from *Escherichia coli* K12 and *yerE* gene from *Yersinia pseudotuberculosis* were expressed and purified following standard molecular biology techniques as explained elsewhere.<sup>[1,2]</sup>

The *sucA* gene of *Escherichia coli* K12 was cloned into a pET-28b (+) (*Novagen*) at *NcoI* and *HindIII* restriction sites. The synthetic gene of *Azoarcus sp.* 22LIN *CDH* (*GeneArt, Invitrogen*) was cloned into pET-21a vector (*Novagen*) at *NdeI* and *XhoI* restriction sides. The resulting constructs were full length sequenced to confirm in-frame cloning. The *SucA* and *CDH* recombinant proteins with C-terminal 6 x histidine tag were over-expressed in *E. coli* BL21(DE3) cells and were consequently purified following standard molecular biology techniques.<sup>[1]</sup>

For the coupled enzymatic system<sup>[3]</sup> the NADH oxidase from *Lactobacillus brevis* and L-glutamate dehydrogenase (L-GluDH) from *Clostridium sp.* were used.

## $^{13}\text{C}$ NMR studies with $\alpha$ -KG and $^{13}\text{C}$ -labeled pyruvate

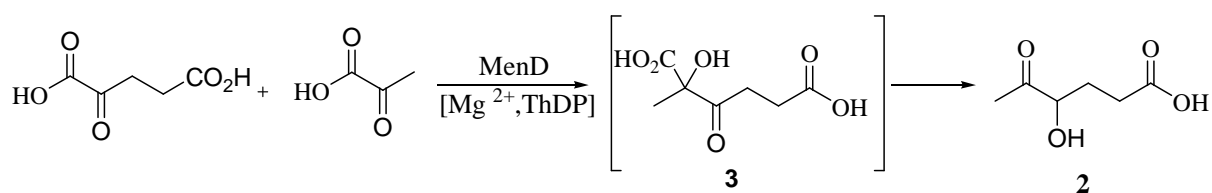

### $\alpha$ -KG + [1- $^{13}\text{C}$ ]-pyruvate

[1- $^{13}\text{C}$ ]-Pyruvate:  $^{13}\text{C}$  NMR ( $\text{D}_2\text{O}$ ):  $\delta = 170.1$  (s),  $178.5$  ppm (s, hydrate).

2-Hydroxy-2-methyl-3-oxohexanedioic acid (3):  $^{13}\text{C}$  NMR ( $\text{D}_2\text{O}$ ):  $\delta = 176.8$  ppm (s).

Carbonate:  $^{13}\text{C}$  NMR ( $\text{D}_2\text{O}$ ):  $\delta = 160.2$  ppm (s).

Carbon dioxide:  $^{13}\text{C}$  NMR ( $\text{D}_2\text{O}$ ):  $\delta = 124.6$  ppm (s).

### $\alpha$ -KG + [1,2- $^{13}\text{C}$ ]-pyruvate

[1,2- $^{13}\text{C}$ ]-Pyruvate:  $^{13}\text{C}$  NMR ( $\text{D}_2\text{O}$ ):  $\delta = 93.9$  (d,  $J = 63$  Hz, hydrate),  $170.2$  (d,  $J = 62$  Hz),  $178.5$  (d,  $J = 63$  Hz, hydrate),  $205.1$  ppm (d,  $J = 62$  Hz).

2-Hydroxy-2-methyl-3-oxohexanedioic acid (3):  $^{13}\text{C}$  NMR ( $\text{D}_2\text{O}$ ):  $\delta = 82.7$  (d,  $J = 51$  Hz),  $176.8$  ppm (d,  $J = 51$  Hz).

4-Hydroxy-5-oxohexanoic acid (2):  $^{13}\text{C}$  NMR ( $\text{D}_2\text{O}$ ):  $\delta = 214.8$  ppm (s).

Carbonate:  $^{13}\text{C}$  NMR ( $\text{D}_2\text{O}$ ):  $\delta = 160.2$  ppm (s).

Acetic acid as side product  $^{13}\text{C}$  NMR ( $\text{D}_2\text{O}$ ):  $\delta = 181.4$  ppm (s).

### $\alpha$ -KG + [2- $^{13}\text{C}$ ]-pyruvate

[2- $^{13}\text{C}$ ]-Pyruvate:  $^{13}\text{C}$  NMR ( $\text{D}_2\text{O}$ ):  $\delta = 93.8$  (s, hydrate),  $205.1$  ppm (s).

2-Hydroxy-2-methyl-3-oxohexanedioic acid (3):  $^{13}\text{C}$  NMR ( $\text{D}_2\text{O}$ ):  $\delta = 82.7$  ppm (s).

4-Hydroxy-5-oxohexanoic acid (2):  $^{13}\text{C}$  NMR ( $\text{D}_2\text{O}$ ):  $\delta = 214.8$  ppm (s).

Carbonate:  $^{13}\text{C}$  NMR ( $\text{D}_2\text{O}$ ):  $\delta = 160.2$  ppm (s).

Acetic acid as side product  $^{13}\text{C}$  NMR ( $\text{D}_2\text{O}$ ):  $\delta = 181.4$  ppm (s).

## $^{13}\text{C}$ NMR studies with $\alpha$ -KG and $^{13}\text{C}$ -labeled acetaldehyde

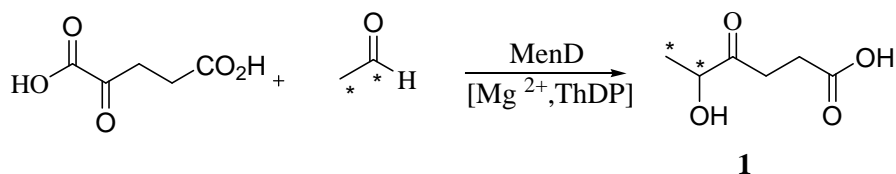

### $\alpha$ -KG + [1,2- $^{13}\text{C}$ ]-acetaldehyde

[1, 2- $^{13}\text{C}$ ]Acetaldehyde:  $^{13}\text{C}$  NMR ( $\text{D}_2\text{O}$ ):  $\delta = 23.3$  (d,  $J = 44$  Hz, hydrate),  $30.2$  (d,  $J = 39$  Hz),  $88.3$  (d,  $J = 44$  Hz, hydrate),  $206.9$  ppm (d,  $J = 39$  Hz).

5-Hydroxy-4-oxohexanoic acid (**1**):  $^{13}\text{C}$  NMR ( $\text{D}_2\text{O}$ ):  $\delta = 18.5$  (d,  $J = 36$  Hz),  $72.8$  ppm (d,  $J = 36$  Hz).

## $^{13}\text{C}$ NMR kinetic studies with in situ production of $^{13}\text{C}$ -labeled $\alpha$ -KG

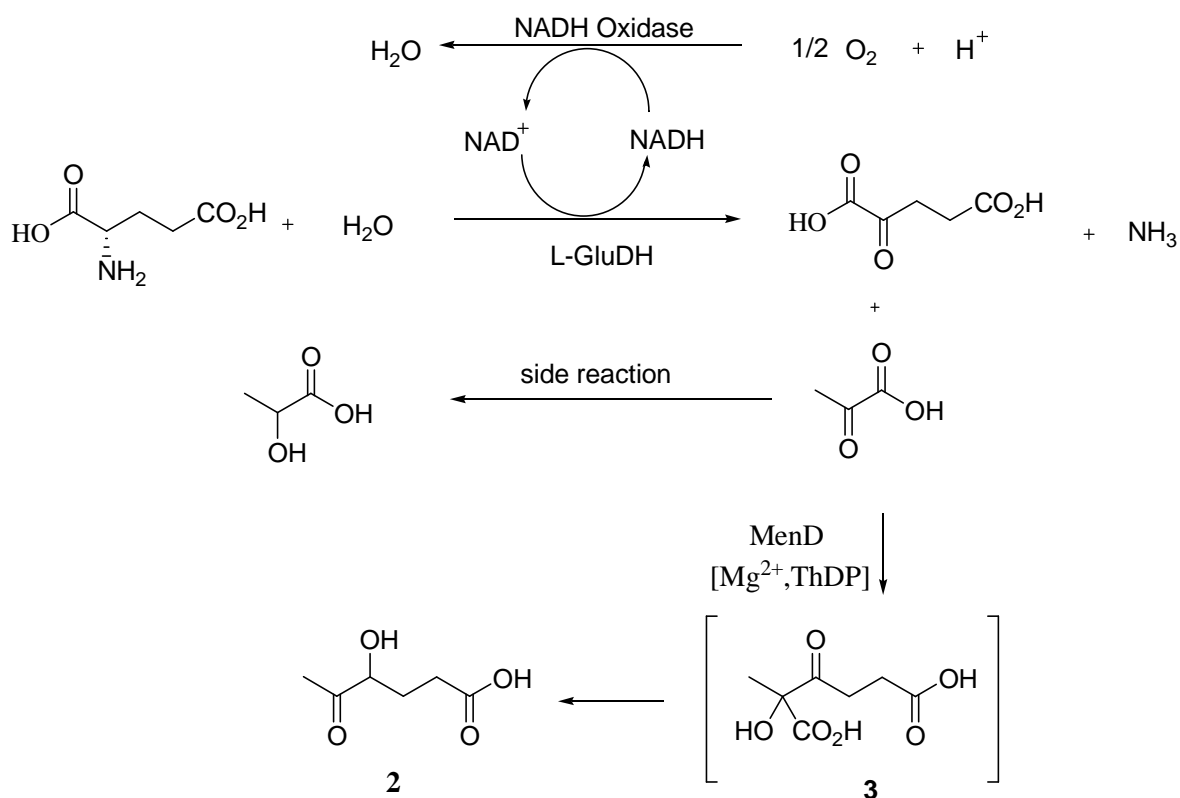

L-[1,2- $^{13}\text{C}$ ]-Glutamic acid:  $^{13}\text{C}$  NMR ( $\text{D}_2\text{O}$ ):  $\delta = 54.8$  (d,  $J = 53$  Hz),  $174.6$  ppm (d,  $J = 53$  Hz).

### L-[1,2- $^{13}\text{C}$ ]-Glutamic acid + [1- $^{13}\text{C}$ ]-pyruvate

2-Hydroxy-2-methyl-3-oxohexanedioic acid (**3**):  $^{13}\text{C}$  NMR ( $\text{D}_2\text{O}$ ):  $\delta = 176.8$  (s),  $212.1$  ppm (s).

4-Hydroxy-5-oxohexanoic acid (**2**):  $^{13}\text{C}$  NMR ( $\text{D}_2\text{O}$ ):  $\delta = 76.5$  ppm (s).

**Carbonate:**  $^{13}\text{C}$  NMR ( $\text{D}_2\text{O}$ ):  $\delta = 160.2$  ppm (s).

**Carbon dioxide:**  $^{13}\text{C}$  NMR ( $\text{D}_2\text{O}$ ):  $\delta = 124.6$  ppm (s).

**Lactate:**  $^{13}\text{C}$  NMR ( $\text{D}_2\text{O}$ ):  $\delta = 182.4$  ppm (s).

**L-[1,2- $^{13}\text{C}$ ]-Glutamic acid + [1,2- $^{13}\text{C}$ ]-pyruvate**

**2-Hydroxy-2-methyl-3-oxohexanedioic acid (3):**  $^{13}\text{C}$  NMR ( $\text{D}_2\text{O}$ ):  $\delta = 82.7$  (dd,  $J = 51, 42$  Hz), 176.8 (d,  $J = 51$  Hz), 212.0 ppm (d,  $J = 42$  Hz).

**4-Hydroxy-5-oxohexanoic acid (2):**  $^{13}\text{C}$  NMR ( $\text{D}_2\text{O}$ ):  $\delta = 76.5$  (d,  $J = 41$  Hz) 214.8 ppm (d,  $J = 41$  Hz).

**Carbonate:**  $^{13}\text{C}$  NMR ( $\text{D}_2\text{O}$ ):  $\delta = 160.2$  ppm (s).

**Carbon dioxide:**  $^{13}\text{C}$  NMR ( $\text{D}_2\text{O}$ ):  $\delta = 124.6$  ppm (s).

**Lactate:**  $^{13}\text{C}$  NMR ( $\text{D}_2\text{O}$ ):  $\delta = 68.5$  (d,  $J = 55$  Hz), 182.4 ppm (d,  $J = 55$  Hz).

**L-[1,2- $^{13}\text{C}$ ]-Glutamic acid + [2- $^{13}\text{C}$ ]-pyruvate**

**2-Hydroxy-2-methyl-3-oxohexanedioic acid (3):**  $^{13}\text{C}$  NMR ( $\text{D}_2\text{O}$ ):  $\delta = 82.7$  (d,  $J = 42$  Hz), 212.0 ppm (d,  $J = 42$  Hz).

**4-Hydroxy-5-oxohexanoic acid (2):**  $^{13}\text{C}$  NMR ( $\text{D}_2\text{O}$ ):  $\delta = 76.5$  (d,  $J = 41$  Hz), 214.8 ppm (d,  $J = 41$  Hz).

**Carbonate:**  $^{13}\text{C}$  NMR ( $\text{D}_2\text{O}$ ):  $\delta = 160.2$  ppm (s).

**Carbon dioxide:**  $^{13}\text{C}$  NMR ( $\text{D}_2\text{O}$ ):  $\delta = 124.6$  ppm (s).

**Lactate:**  $^{13}\text{C}$  NMR ( $\text{D}_2\text{O}$ ):  $\delta = 68.5$  ppm (s).

**Acetic acid as side product**  $^{13}\text{C}$  NMR ( $\text{D}_2\text{O}$ ):  $\delta = 181.4$  ppm (s).

## Summary table for the chemical shifts of $^{13}\text{C}$ -labeled compounds

| MenD                                                                     | Pyruvate                                                                          |          | 3                                                                                 |          |          | 2                                                                                  |          | 1                                                                                   |         |
|--------------------------------------------------------------------------|-----------------------------------------------------------------------------------|----------|-----------------------------------------------------------------------------------|----------|----------|------------------------------------------------------------------------------------|----------|-------------------------------------------------------------------------------------|---------|
|                                                                          | 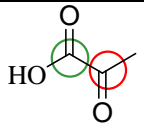 |          |  |          |          |  |          |  |         |
|                                                                          | C-1                                                                               | C-2      | C-1                                                                               | C-2      | C-3      | C-4                                                                                | C-5      | C-5                                                                                 | C-6     |
|                                                                          | ppm                                                                               |          | ppm                                                                               |          |          | ppm                                                                                |          | ppm                                                                                 |         |
| $\alpha$ -KG + [1- $^{13}\text{C}$ ]-pyruvate                            | 170.1(s)                                                                          | -        | 176.8(s)                                                                          | -        | -        | -                                                                                  | -        | -                                                                                   | -       |
| $\alpha$ -KG + [1,2- $^{13}\text{C}$ ]-pyruvate                          | 170.2(d)                                                                          | 205.1(d) | 176.8(d)                                                                          | 82.7(d)  | -        | -                                                                                  | 214.8(s) | -                                                                                   | -       |
| $\alpha$ -KG + [2- $^{13}\text{C}$ ]-pyruvate                            | -                                                                                 | 205.1(s) | -                                                                                 | 82.7(s)  | -        | -                                                                                  | 214.8(s) | -                                                                                   | -       |
| $\alpha$ -KG + [1,2- $^{13}\text{C}$ ]-acetaldehyde                      | -                                                                                 | -        | -                                                                                 | -        | -        | -                                                                                  | -        | 72.8(d)                                                                             | 18.5(d) |
| L-[1,2- $^{13}\text{C}$ ]-Glutamic acid + [1- $^{13}\text{C}$ ]-pyruvate | 170.1(s)                                                                          | -        | 176.8(s)                                                                          | -        | 212.1(s) | 76.5(s)                                                                            | -        | -                                                                                   | -       |
| L-[1,2- $^{13}\text{C}$ ]-Glutamic acid+[1,2- $^{13}\text{C}$ ]-pyruvate | 170.2(d)                                                                          | 205.1(d) | 176.8(d)                                                                          | 82.7(dd) | 212.1(d) | 76.5(d)                                                                            | 214.8(d) | -                                                                                   | -       |
| L-[1,2- $^{13}\text{C}$ ]-Glutamic acid + [2- $^{13}\text{C}$ ]-pyruvate | -                                                                                 | 205.1(s) | -                                                                                 | 82.7(d)  | 212.1(d) | 76.5(d)                                                                            | 214.8(d) | -                                                                                   | -       |

## Enzyme separation by ultrafiltration

To follow the intermediate **3** in the absence of the enzyme, the reaction was started with [1,2-<sup>13</sup>C]-pyruvate and MenD under the standard reaction condition mentioned above (1.5 mL reaction volume). After 5 hours, the <sup>13</sup>C-NMR experiment proved the formation of the intermediate. Then the enzyme was removed by ultrafiltration using Vivaspin 20 [10 MWCO] concentrator (Sartorius). Qualitative screening by Bradford assay in 96 well plates as well as SDS-PAGE confirmed complete removal of the protein from the solution. Then the solution was filled in NMR tube and the reaction was directly followed by sequential <sup>13</sup>C-NMR experiments.

## <sup>13</sup>C NMR studies for YerE-catalyzed carboligation of pyruvate and 2-oxobutyrate:

### 2-oxobutyrate + [2-<sup>13</sup>C]-pyruvate

[2, 3-<sup>13</sup>C]-acetolactate (**4**): <sup>13</sup>C NMR (D<sub>2</sub>O): δ = 82.7 (d, *J* = 43 Hz), 211.7 ppm (d, *J* = 43 Hz).

[3-<sup>13</sup>C]-acetohydroxybutyrate (**5**): <sup>13</sup>C NMR (D<sub>2</sub>O): δ = 212.0 ppm (s).

[1, 2-<sup>13</sup>C]-acetoin (**6**): <sup>13</sup>C NMR (D<sub>2</sub>O): δ = 73.1 (d, *J* = 41 Hz), 215.5 ppm (d, *J* = 41 Hz).

**3-Hydroxypentan-2-one** (**7**): <sup>13</sup>C NMR (D<sub>2</sub>O): δ = 215.4 ppm (s).

**2-Hydroxypentan-3-one** (**8**): <sup>13</sup>C NMR (D<sub>2</sub>O): δ = 72.6 ppm (s).

## References:

- [1] Kurutsch, A.; Richter, M.; Brecht, V.; Sprenger, G. A.; Müller, M. *J. Mol. Catal. B: Enzym.* **2009**, *61*, 56.
- [2] Lehwald, P.; Richter, M.; Röhr, C.; Liu, H. W.; Müller, M. *Angew. Chem., Int. Ed.* **2010**, *49*, 2389.
- [3] Ödman, P.; Wellborn, W. B.; Bommarius, A. S. *Tetrahedron: Asymmetry* **2004**, *15*, 2933.

### CD spectra:

MenD-catalyzed reaction of  $\alpha$ -KG with (a) pyruvate or (b) acetaldehyde over time. Time delay between each scan was set to 60 minutes.

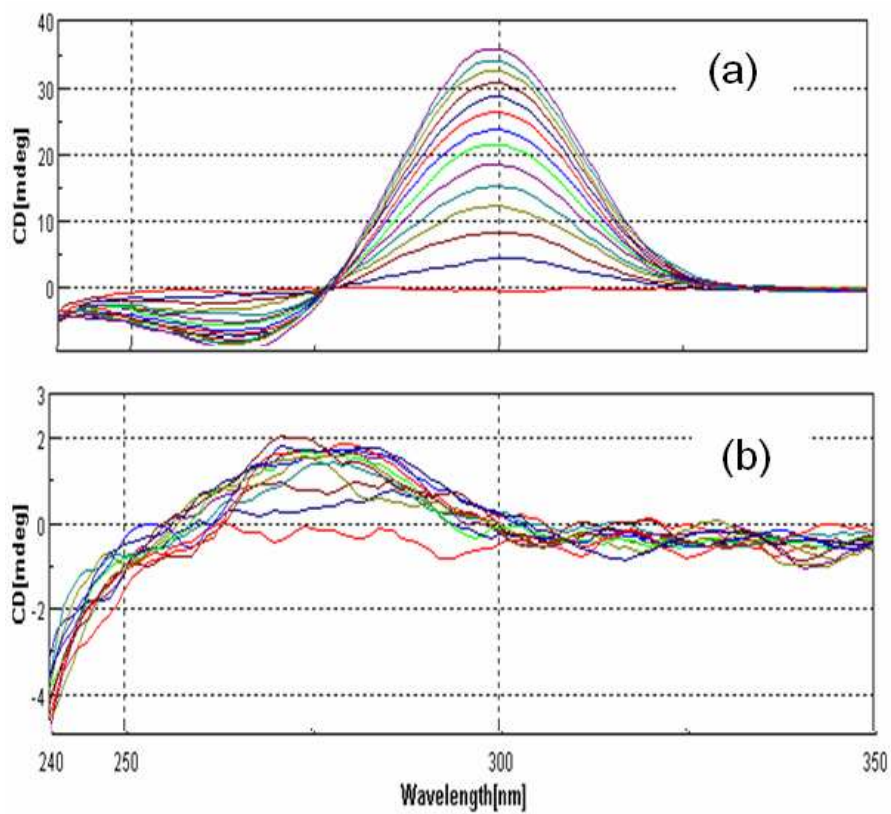



### NMR spectra: $\alpha$ -KG + [1- $^{13}$ C]-pyruvate

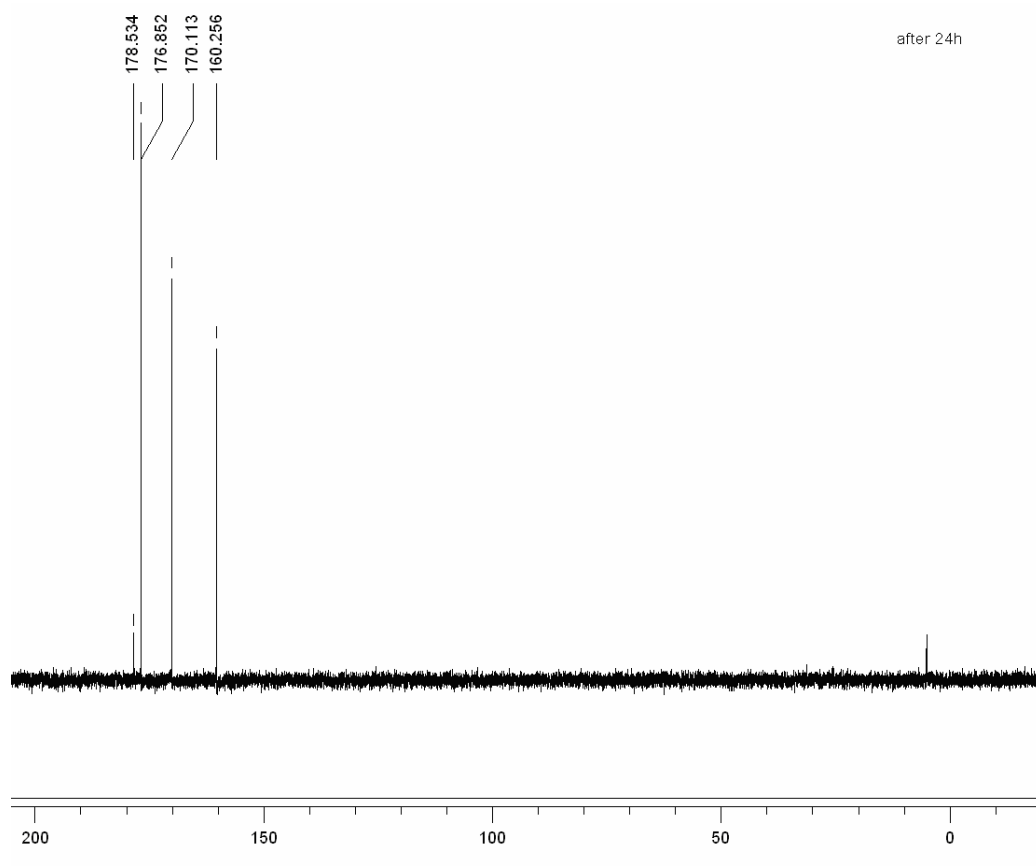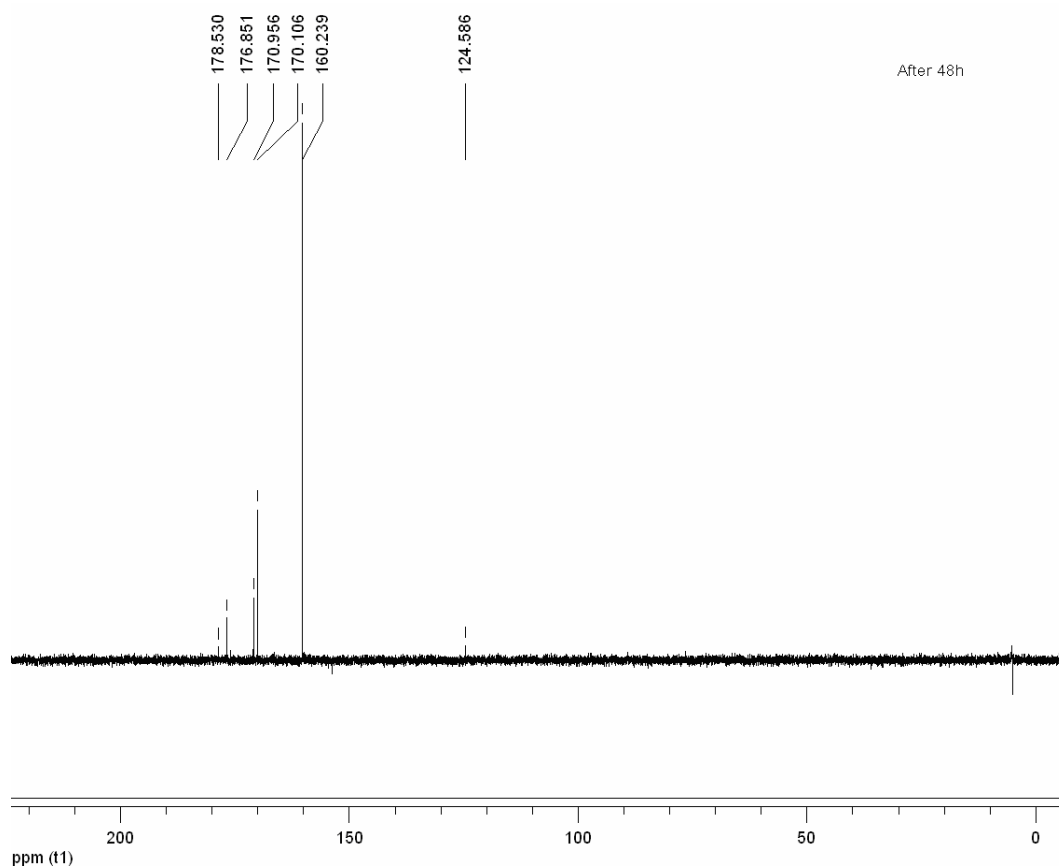

**$\alpha$ -KG + [1,2- $^{13}$ C]-pyruvate**

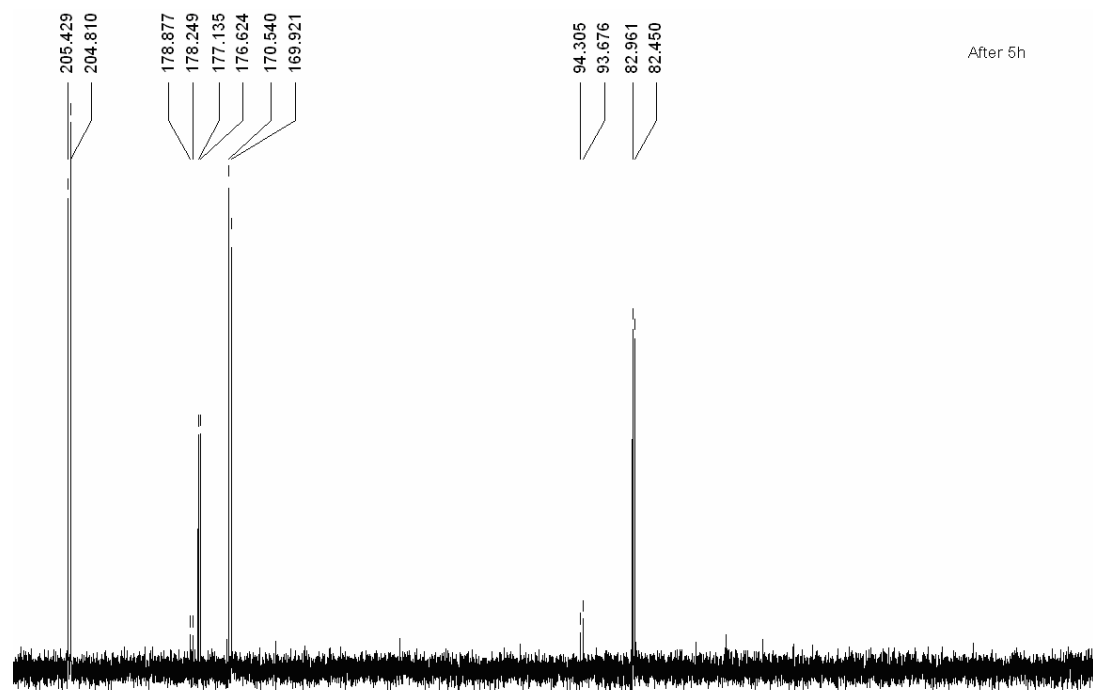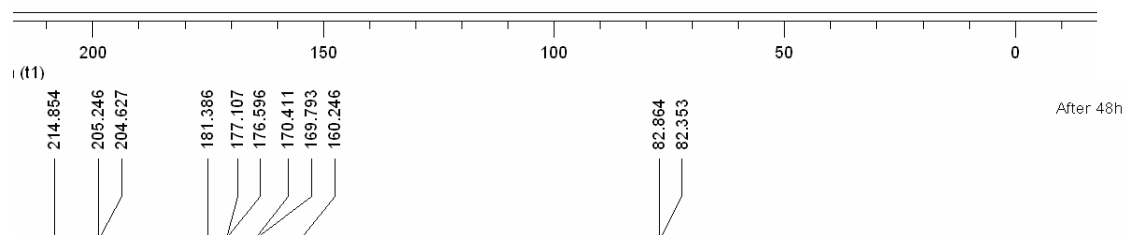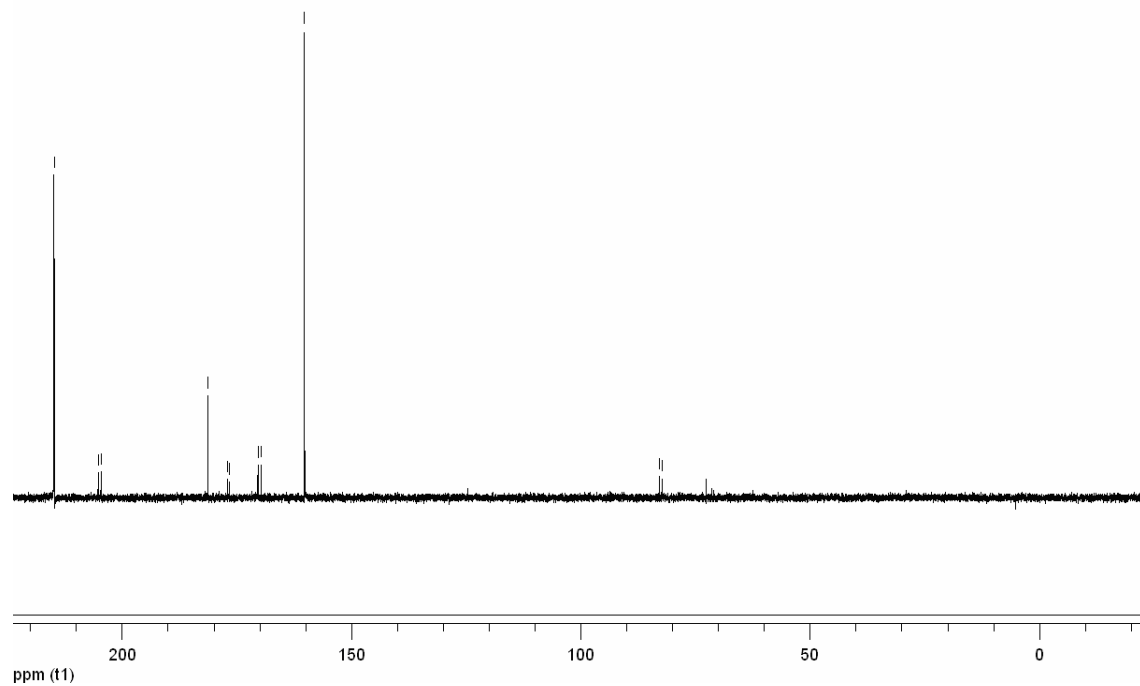

**$\alpha$ -KG + [2- $^{13}$ C]-pyruvate**

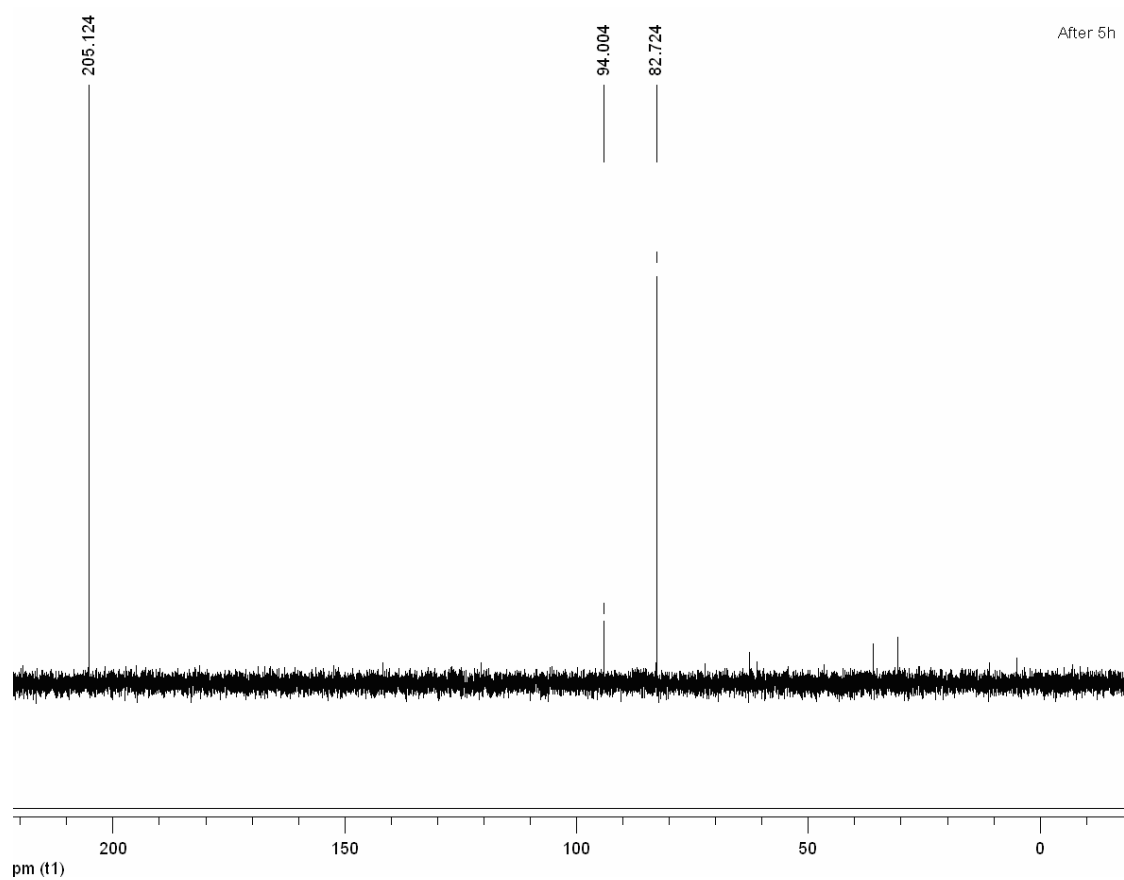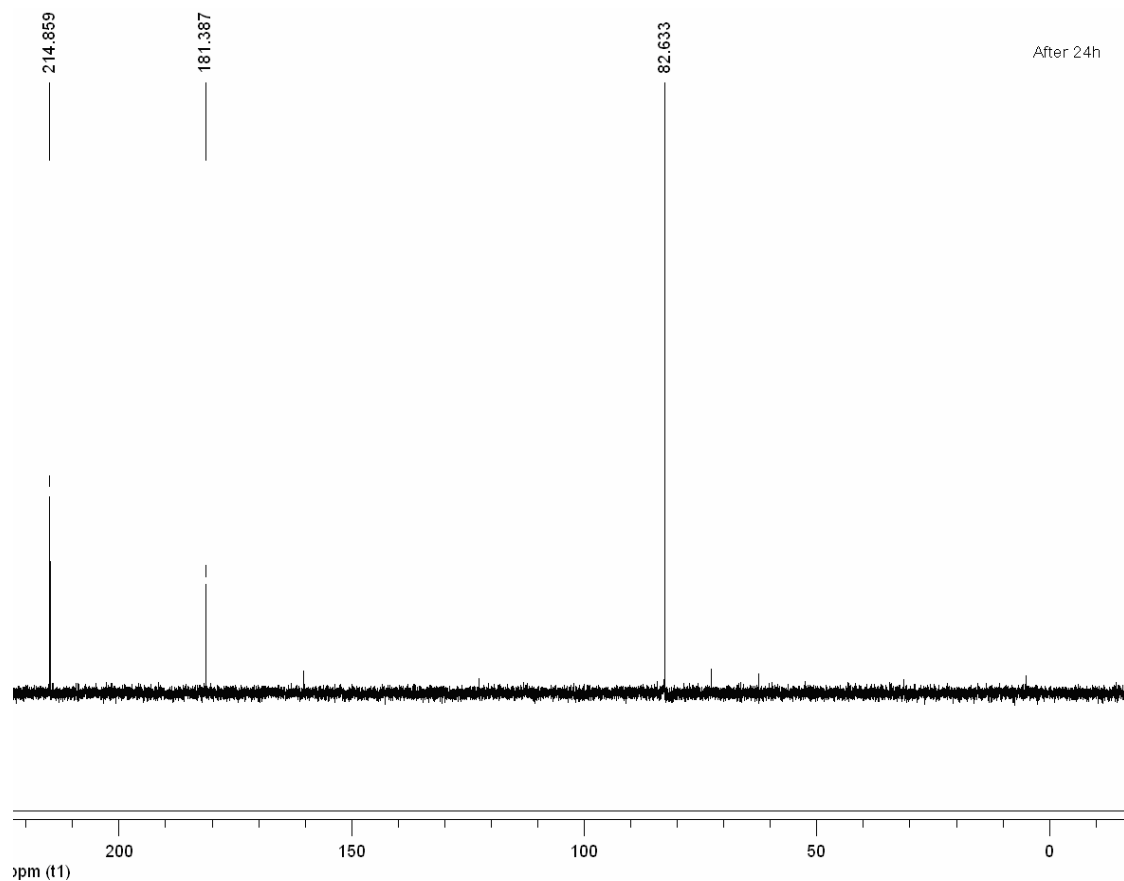

**$\alpha$ -KG + [1,2- $^{13}$ C]-acetaldehyde**

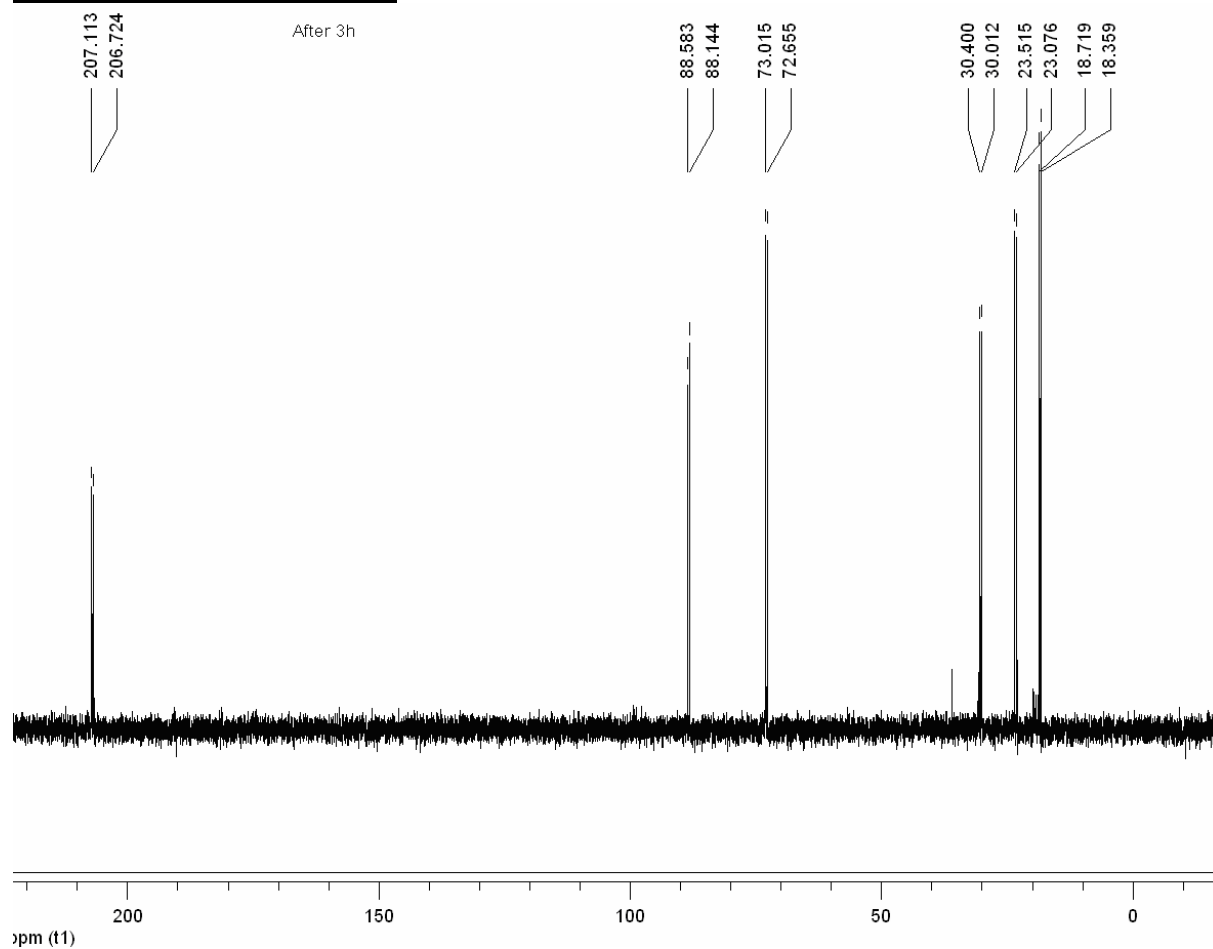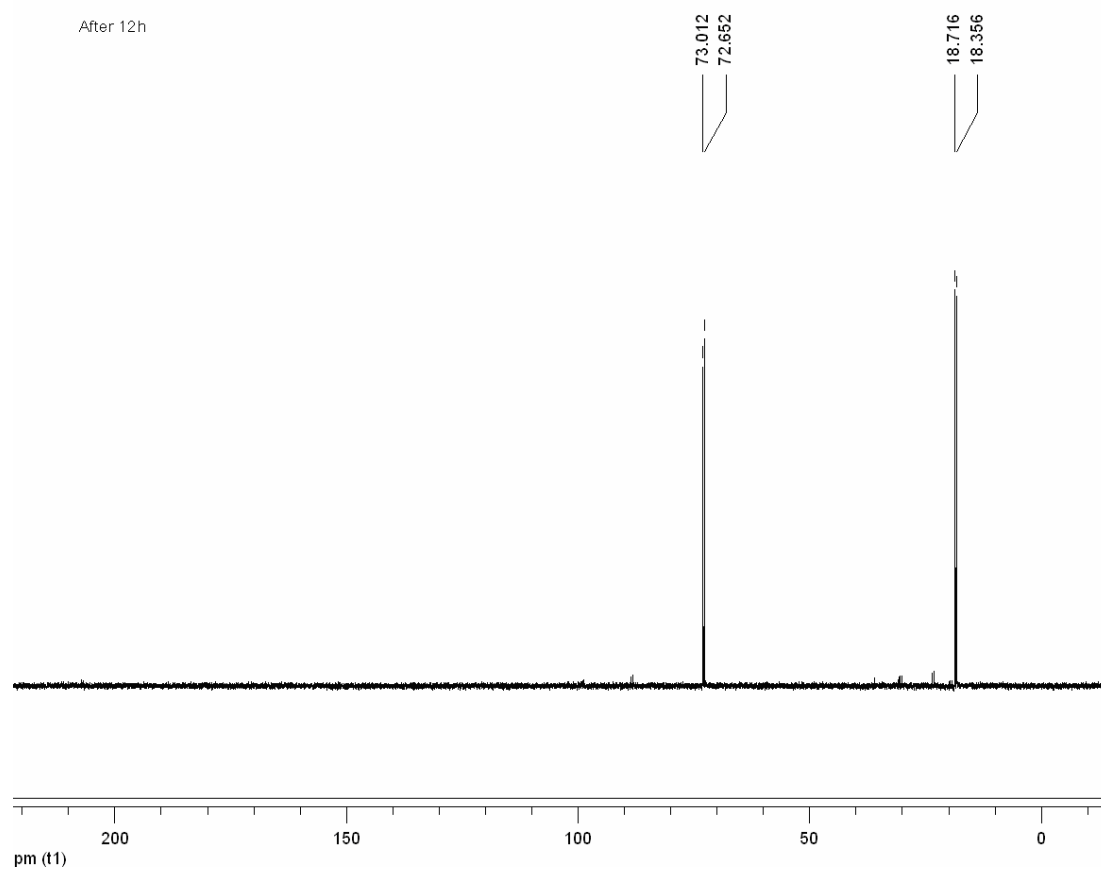

**L-[1,2-<sup>13</sup>C]-Glutamic acid + [1-<sup>13</sup>C]-pyruvate**

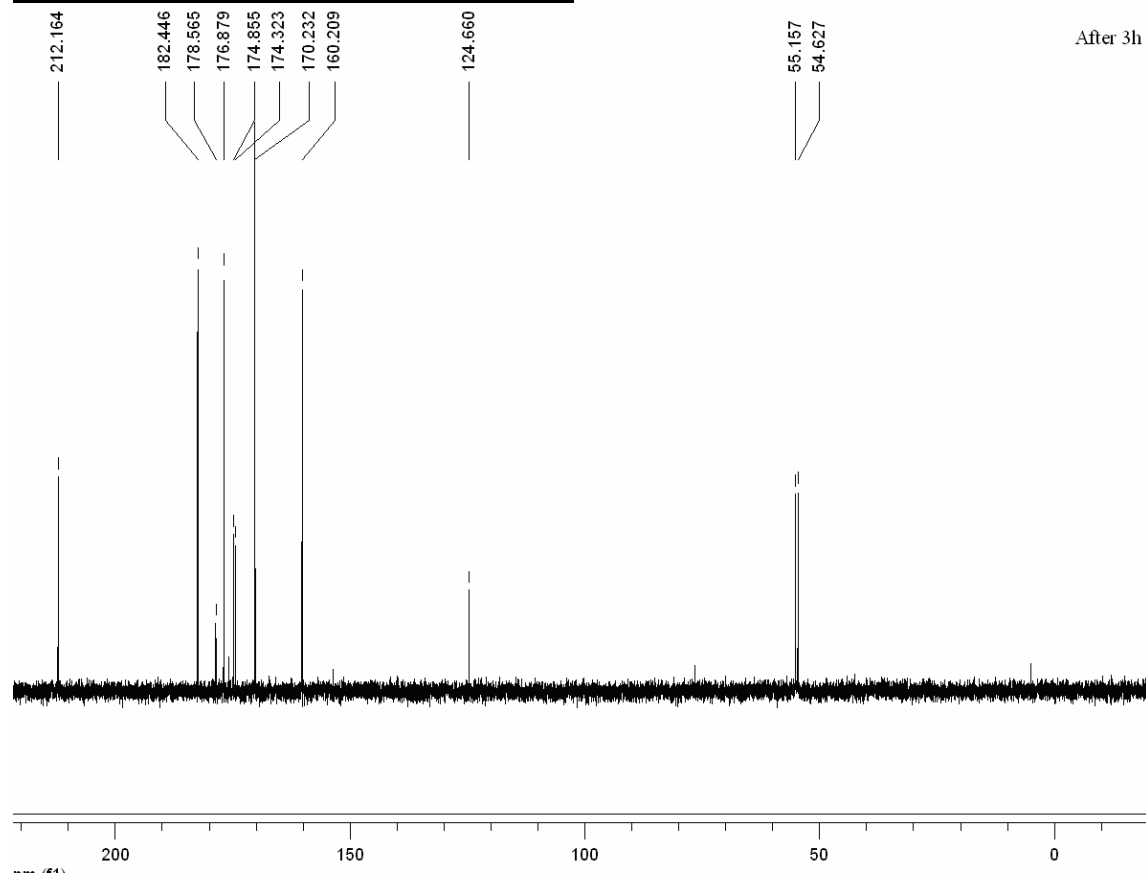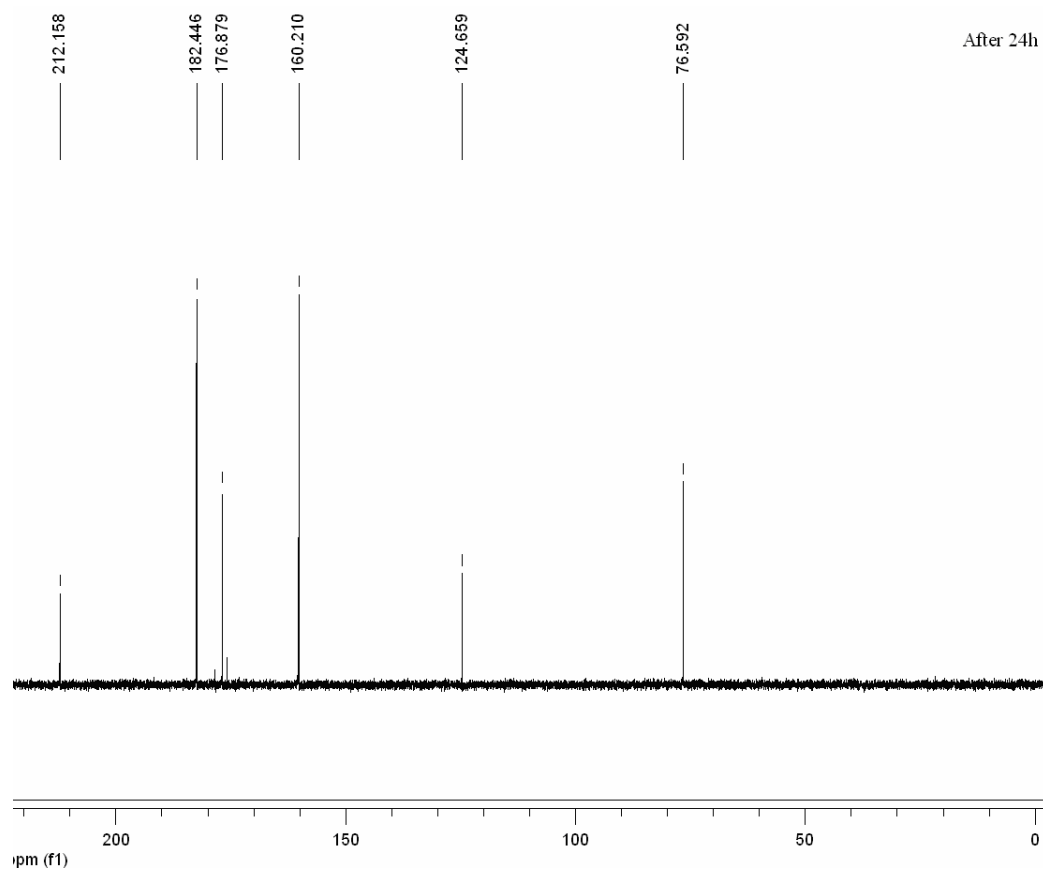

**L-[1,2-<sup>13</sup>C]-Glutamic acid + [1,2-<sup>13</sup>C]-pyruvate**

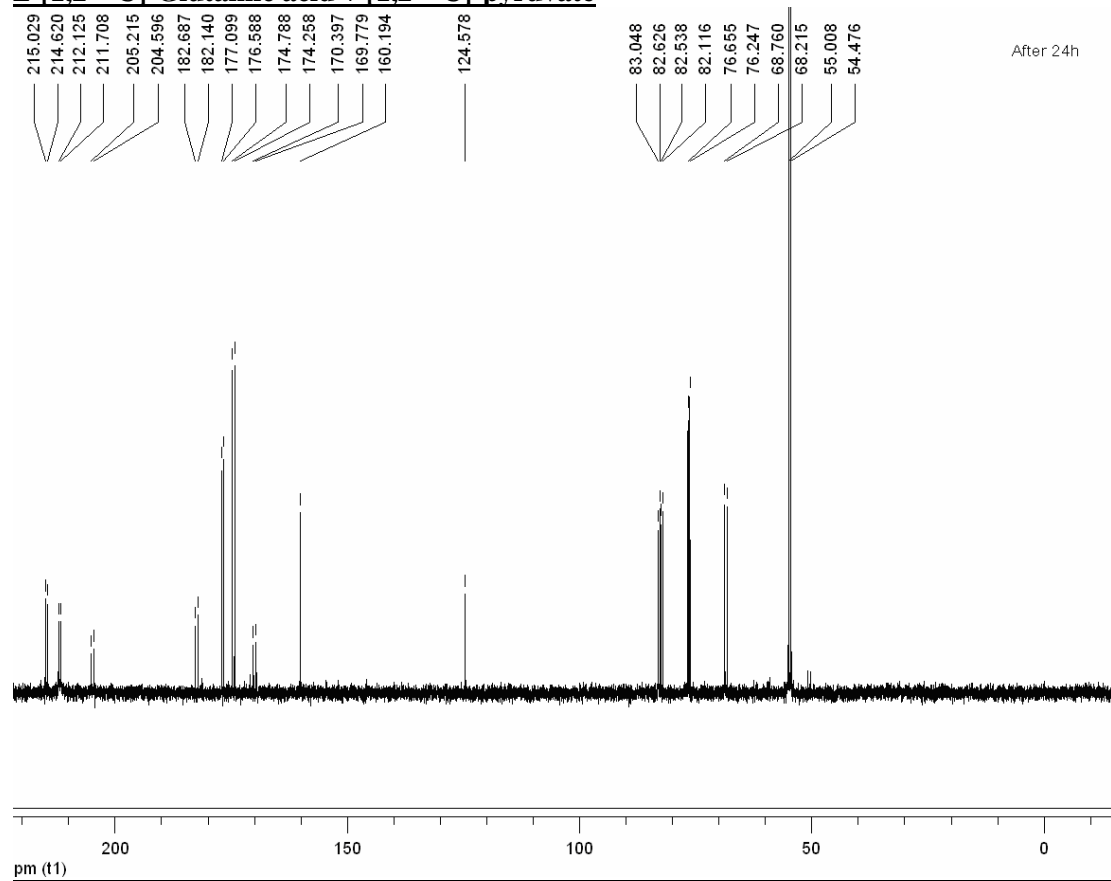

**L-[1,2-<sup>13</sup>C]-Glutamic acid + [2-<sup>13</sup>C]-pyruvate**

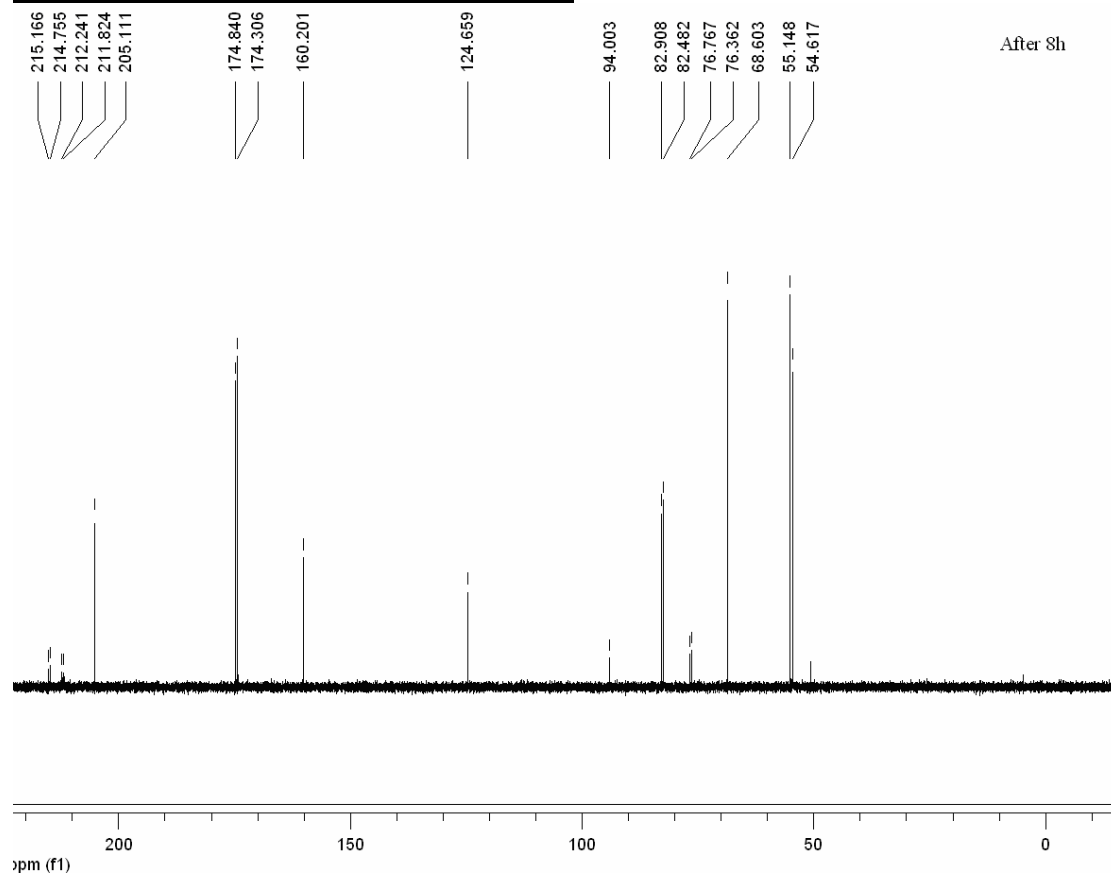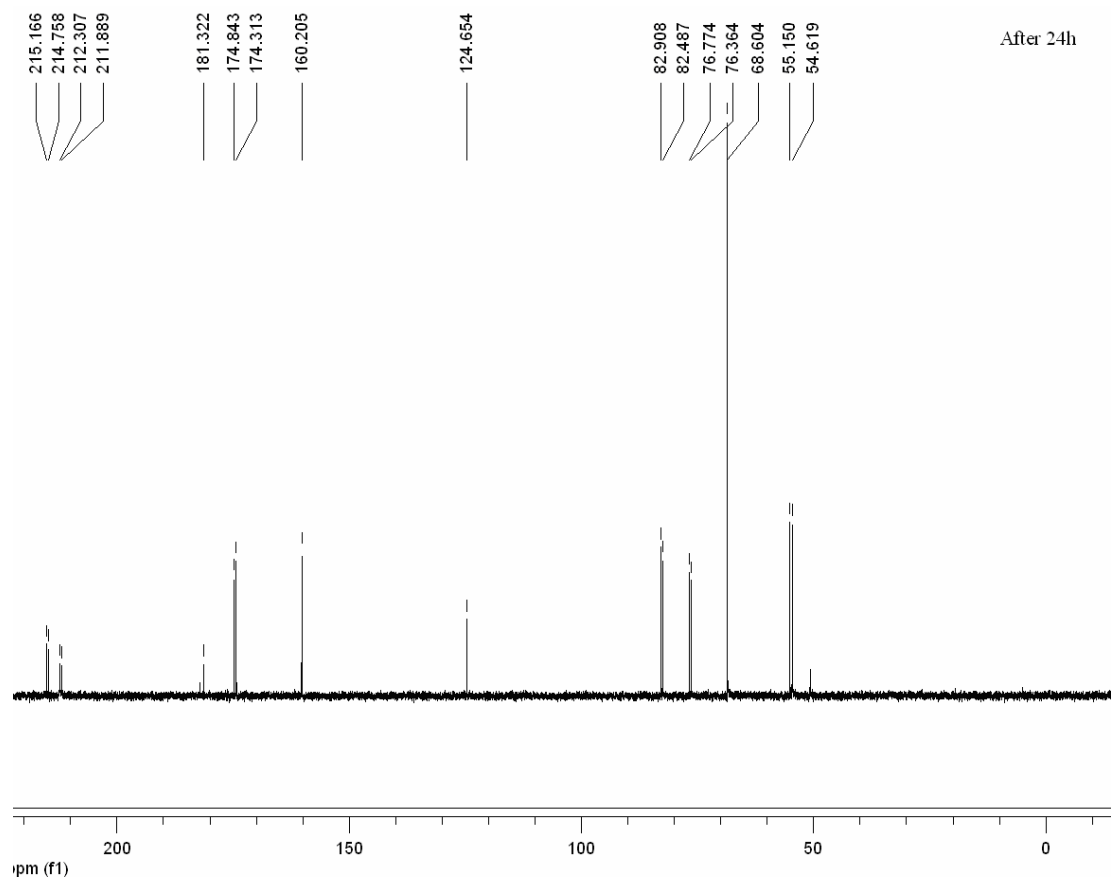

### 2-Oxobutyrate + [2-<sup>13</sup>C]-pyruvate

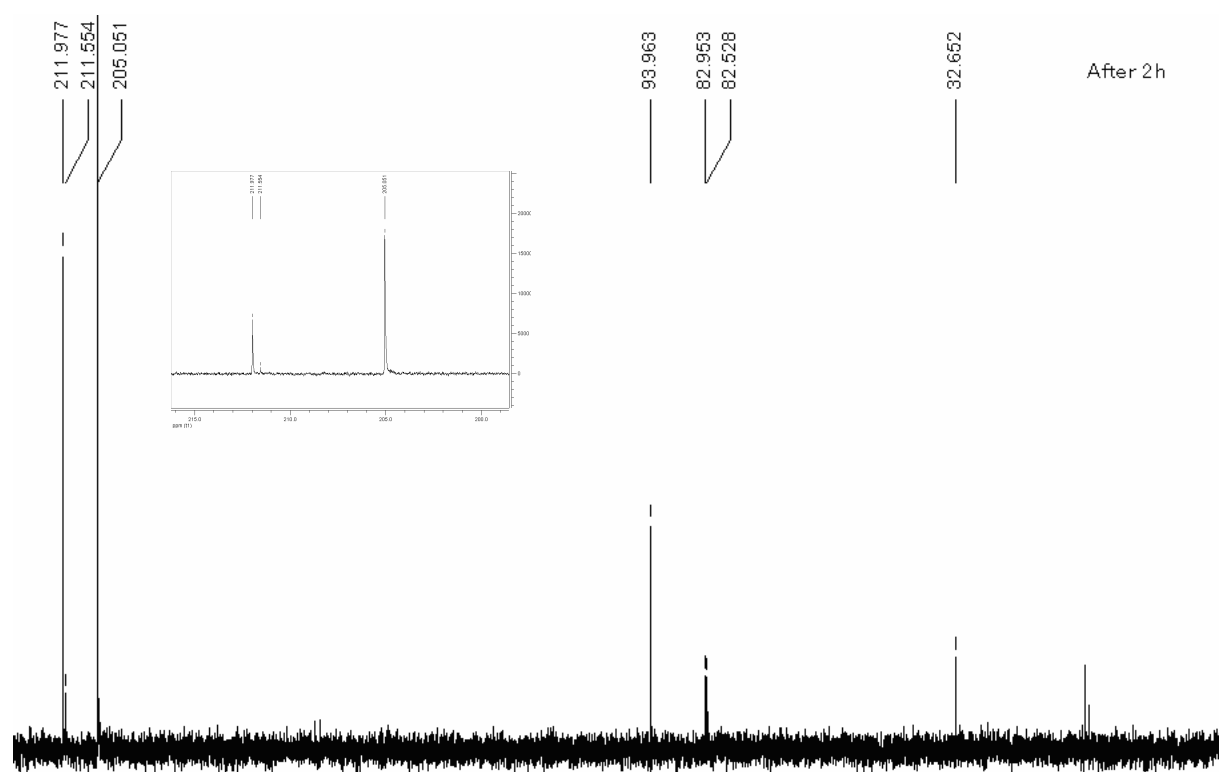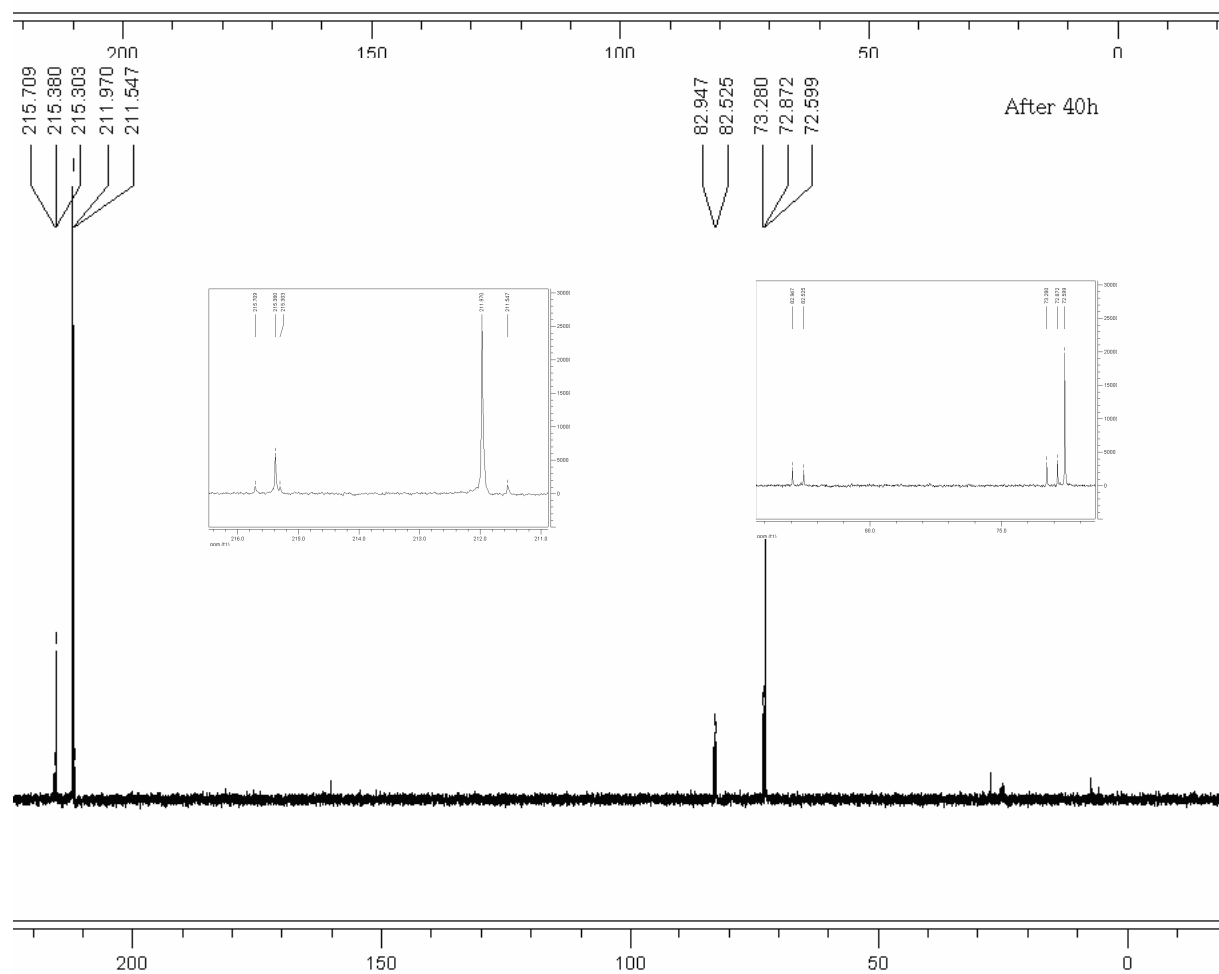



### Spectra of Deuterium labeling experiments

$^1\text{H}$  NMR of **1** in  $\text{CD}_3\text{OD}$  (up)

$^2\text{H}$  NMR of **1** in  $\text{CH}_3\text{OH}$  after incubation in  $\text{D}_2\text{O}$  for 48 h (bottom)

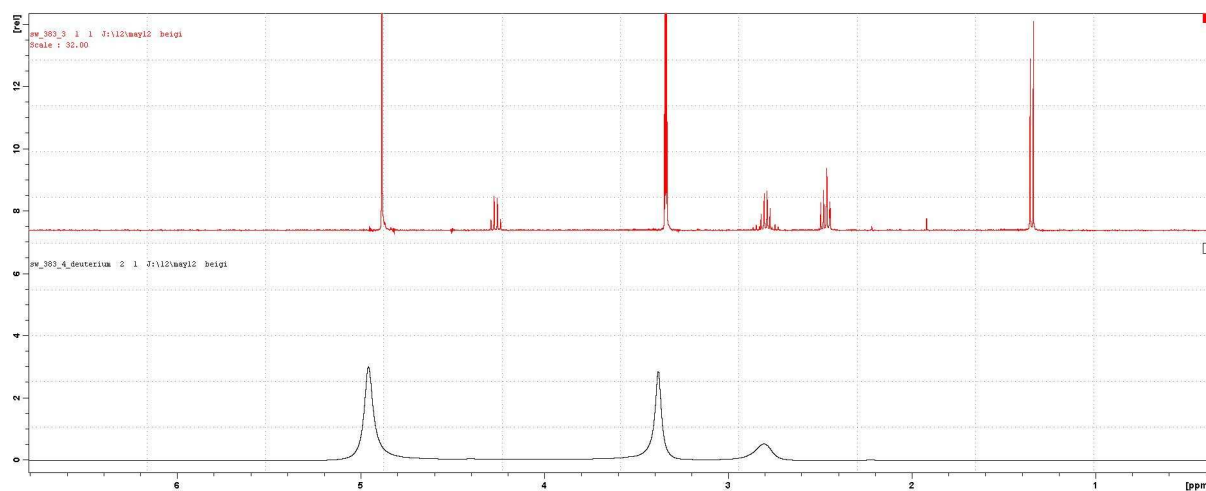

$^{13}\text{C}$  NMR of **1** in  $\text{CD}_3\text{OD}$  after incubation in  $\text{D}_2\text{O}$  for 48 h

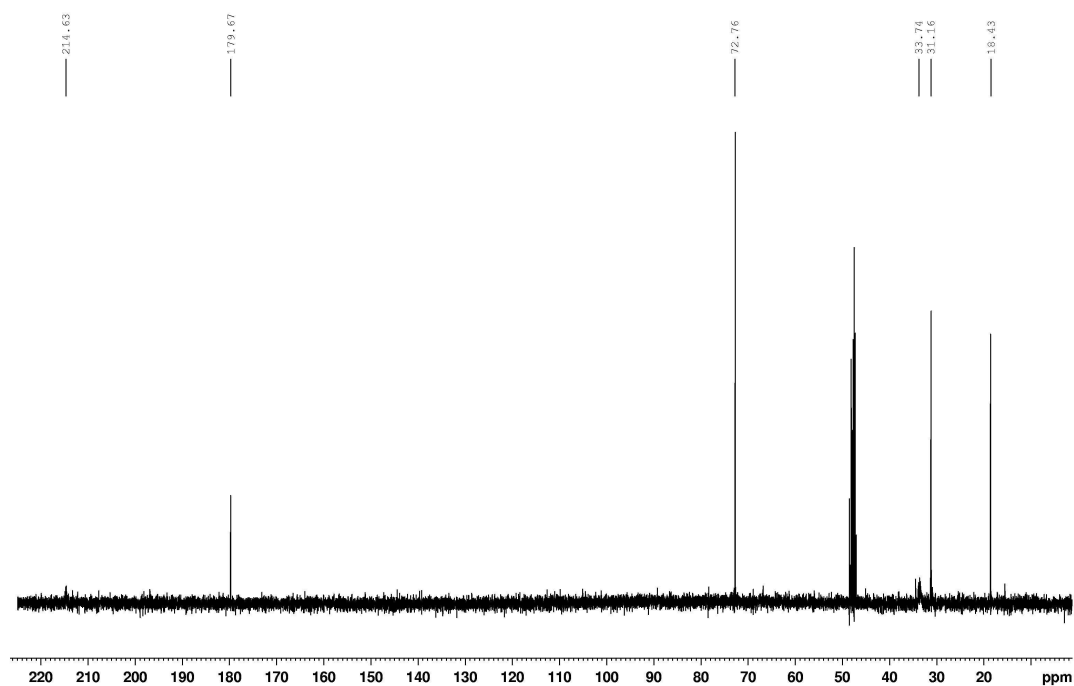

Supplement: c2ob26981c.pdf [file c2ob26981c.pdf]
